# Supplementary material for: An in situ dual-modification strategy for O3-NaNi1/3Fe1/3Mn1/3O2 towards high-performance sodium-ion batteries
Source: Royal Society of Chemistry journal article supplement (doi:10.1039/d3ta03640e), 2023-01-01
Supplement: d3ta03640e1.pdf [file d3ta03640e1.pdf]

## Supporting Information

### ***In Situ* Dual-Modification Strategy for O<sub>3</sub>-NaNi<sub>1/3</sub>Fe<sub>1/3</sub>Mn<sub>1/3</sub>O<sub>2</sub> towards High-Performance Sodium-Ion Batteries**

Ningyun Hong<sup>a</sup>, Jianwei Li<sup>c</sup>, Shihong Guo<sup>a</sup>, Huawei Han<sup>a</sup>, Haoji Wang<sup>b</sup>, Xinyu Hu<sup>b</sup>, Jiangnan Huang<sup>b</sup>, Baichao Zhang<sup>b</sup>, Fang Hua<sup>a</sup>, Bai Song<sup>f</sup>, Nesrin Bugday<sup>c</sup>, Sedat Yasar<sup>c</sup>, Serdar Altin<sup>d</sup>, Wentao Deng<sup>b,\*</sup>, Guoqiang Zou<sup>b</sup>, Hongshuai Hou<sup>b</sup>, Zhen Long<sup>a,\*</sup>, Xiaobo Ji<sup>b,\*</sup>

<sup>a</sup> Tianjin Key Laboratory of Functional Crystal Materials, Institute of Functional Crystal, College of Material Science and Engineering, Tianjin University of Technology, Tianjin, China

<sup>b</sup> State Key Laboratory of Powder Metallurgy, College of Chemistry and Chemical Engineering, Central South University, Changsha, China

<sup>c</sup> Department of Chemistry, Inonu University, Malatya, Turkey

<sup>d</sup> Department of Physics, Inonu University, Malatya, Turkey

<sup>e</sup> Key Laboratory of Comprehensive and Highly Efficient Utilization of Salt Lake Resources, Qinghai Institute of Salt Lakes, Chinese Academy of Sciences (CAS), Xining, China

<sup>f</sup> Dongying Cospowers Technology Limited Company, China

### Supplementary Note:

The Na<sup>+</sup> chemical diffusion coefficients for GITT results can be calculated by the Weppner and Huggins equation:

$$D_{\text{GITT}} = \frac{4}{\pi\tau} \left( \frac{m_B V_M}{M_B S} \right)^2 \left( \frac{\Delta E_s}{\Delta E_\tau} \right)^2 \quad (\tau \ll L^2/D) \quad (1)$$

Where  $m_B$ ,  $M_B$ ,  $S$ , and  $V_M$  are the molecular weight, mass and molar volume of the cathode electrode, respectively.  $S$  and  $L$  represent the surface area and average radius of the active material particles.  $\Delta E_s$  and  $\Delta E_\tau$  are steady-state voltage and the total change of the cell voltage during the current pulse process.

For CV results, the apparent Na<sup>+</sup> diffusion coefficients  $D_{\text{Na}^+}$  can be calculated based on the Randles-Sevcik equation:

$$I_p = 2.69 \times 10^5 n^{3/2} A D_{\text{Na}^+}^{1/2} \nu^{1/2} \Delta C_0 \quad (2)$$

Where  $I_p$  is the peak current,  $n$  denotes the electron transfer number of the reaction,  $A$  represents the electrode area of the cathode,  $\nu$  represents the scan rate, and  $\Delta C_0$  is the concentration of Na<sup>+</sup> in the lattice.

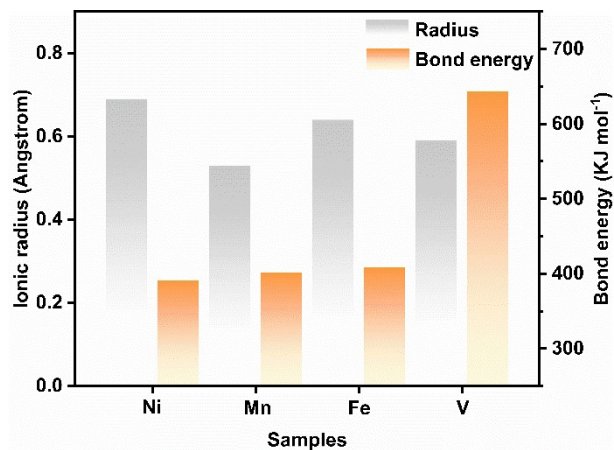

**Fig. S1.** The comparison of ionic radius and bonding energy with different elements.

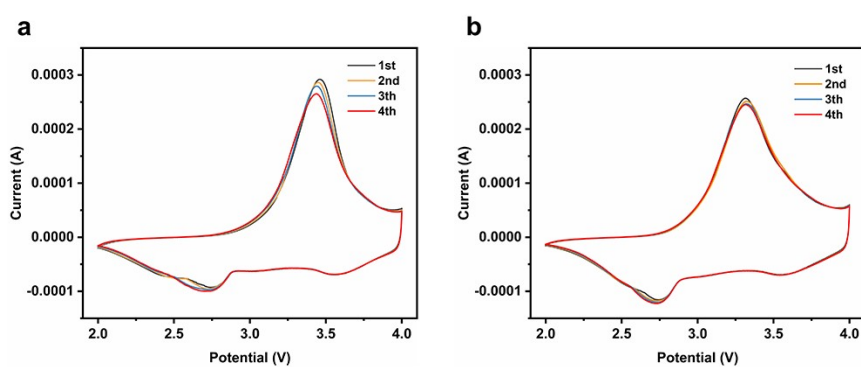

**Fig. S2.** (a-b) The initial four CV curves at a scanning rate of  $0.1 \text{ mV s}^{-1}$  for NFM and NFMV-1.

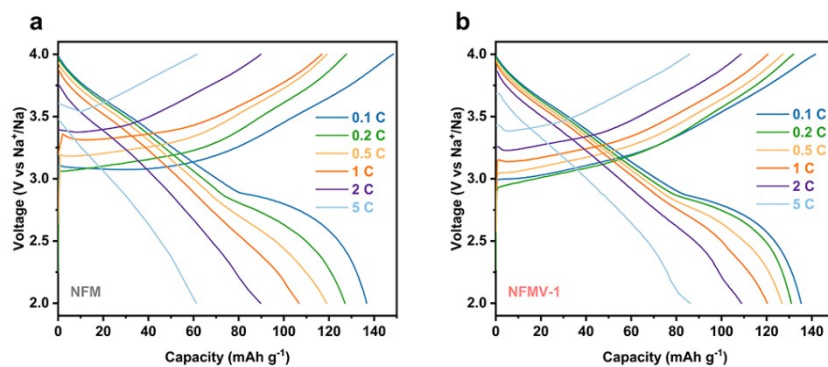

**Fig. S3.** (a-b) GCD curves at different current rate for NFM and NFMV-1.

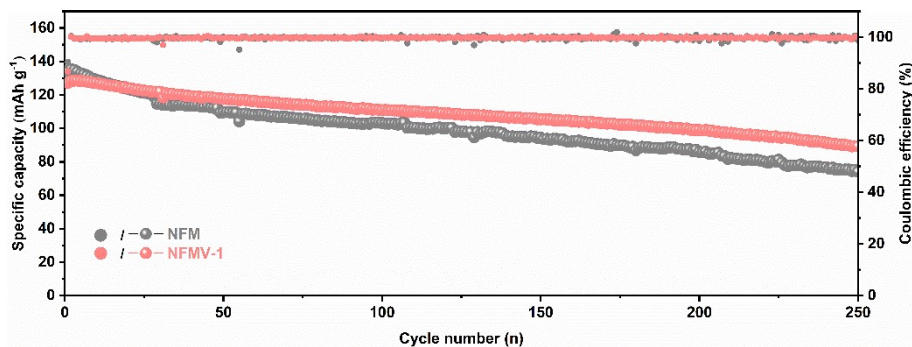

**Fig. S4.** Long-term cycling performance of NFM and NFMV-1 at 1 C at the voltage from 2.0-4.2 V

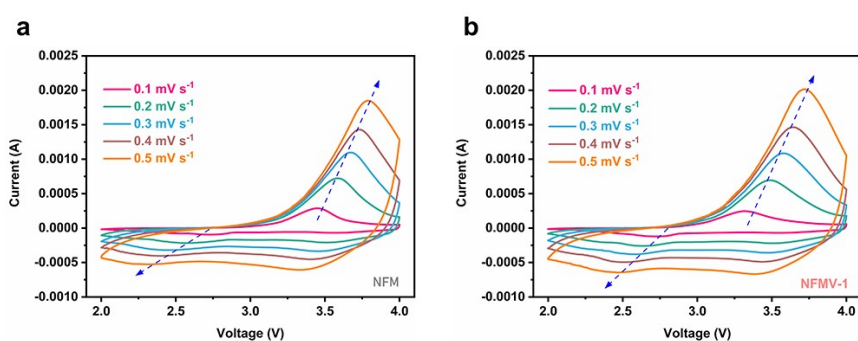

**Fig. S5.** (a-b) GCD curves at different scan rate for NFM and NFMV-1.

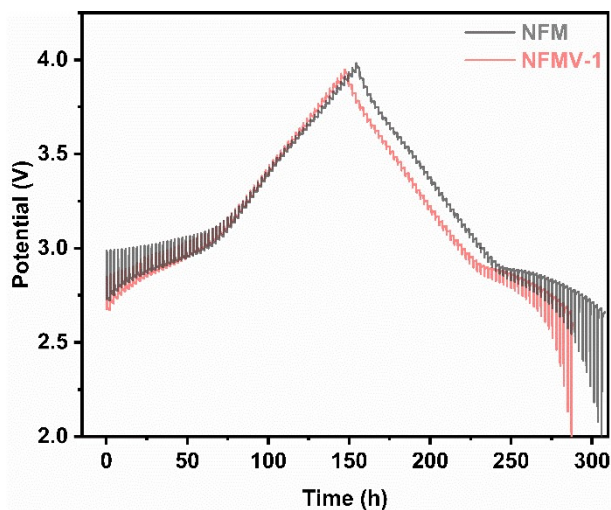

**Fig. S6.** Transient voltage-time profile obtained from GITT test for the obtained Samples.

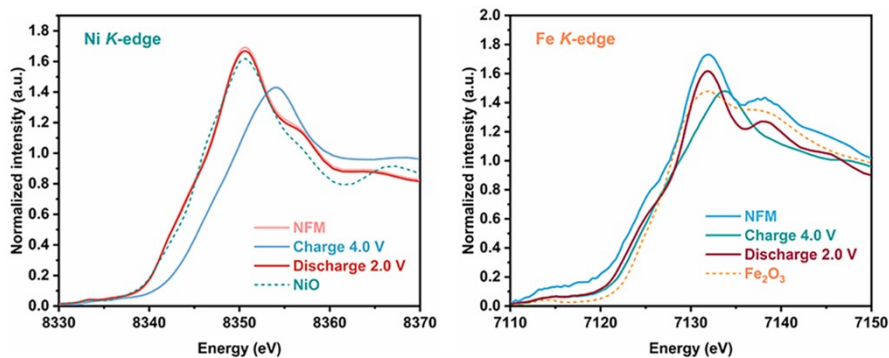

**Fig. S7.** Ni/Fe K-edge of NFM under different charging state.

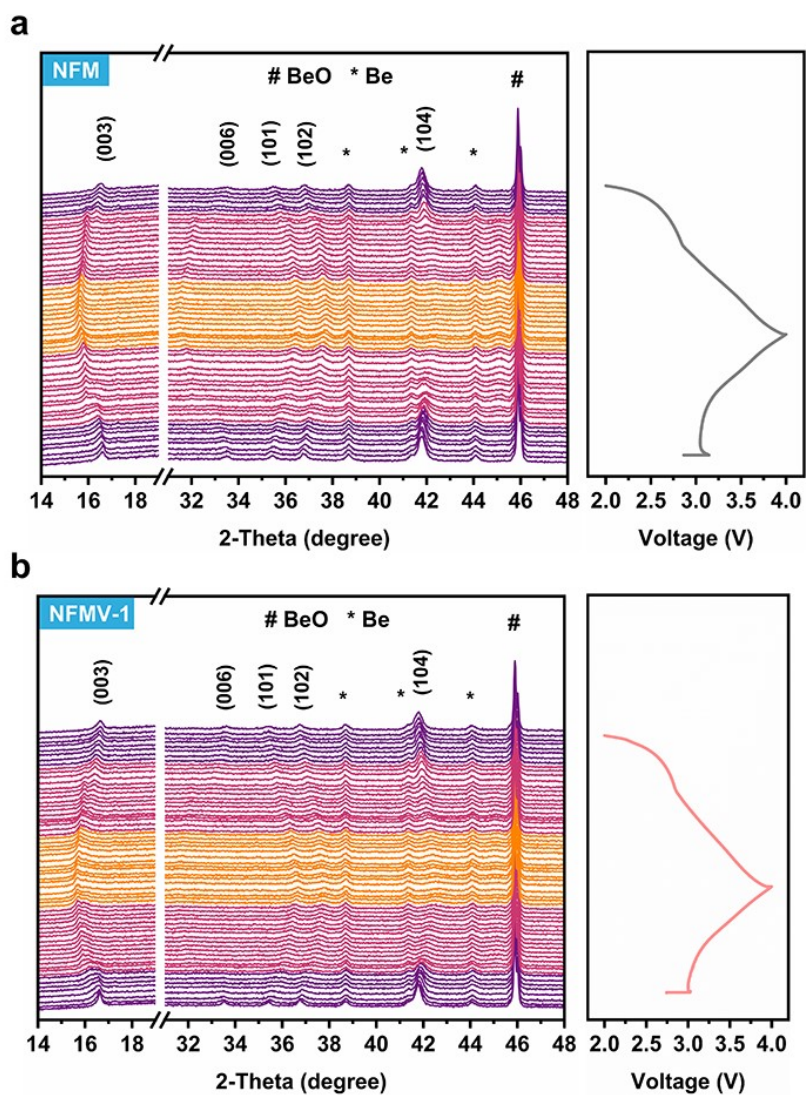

**Fig. S8.** In situ XRD patterns collected during the first charge/discharge of NFM and NFMV-1 over a voltage range of 2.0-4.0 V.



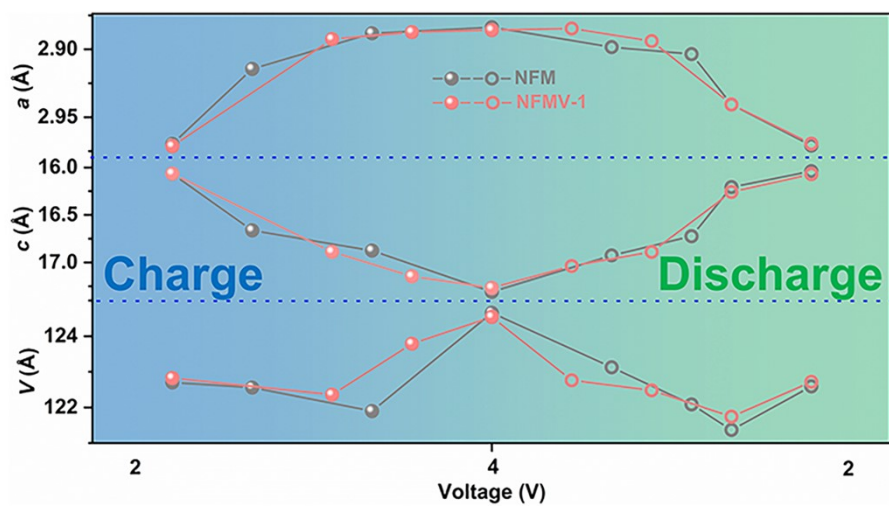

**Fig. S9.** The detailed change of lattice parameters of selected electrodes during the cycling process.

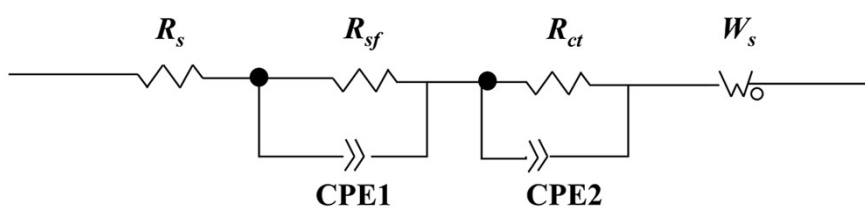

**Fig. S10.** equivalent circuit of EIS.

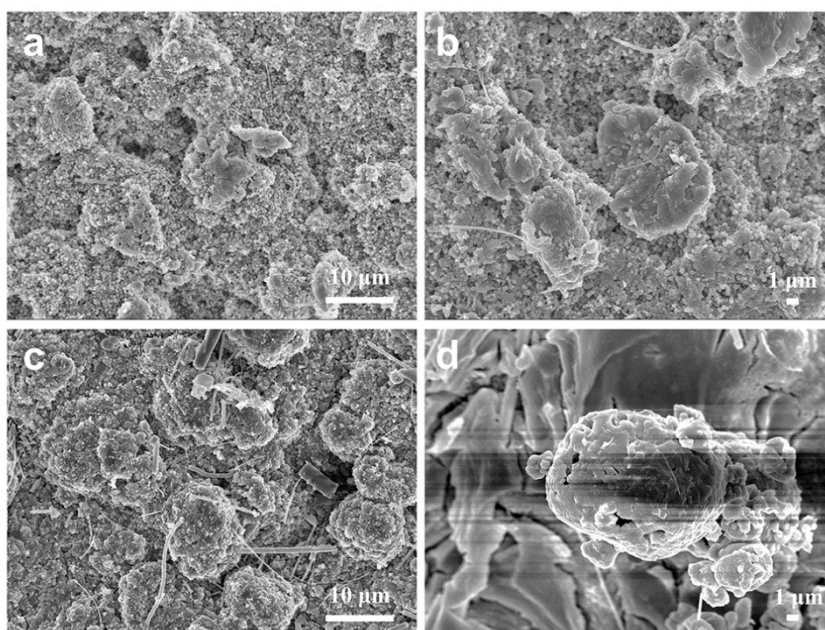

**Fig. S11.** SEM image of the of cycled cathodes for (a-b) NFM, (c-d)NFMV-1.

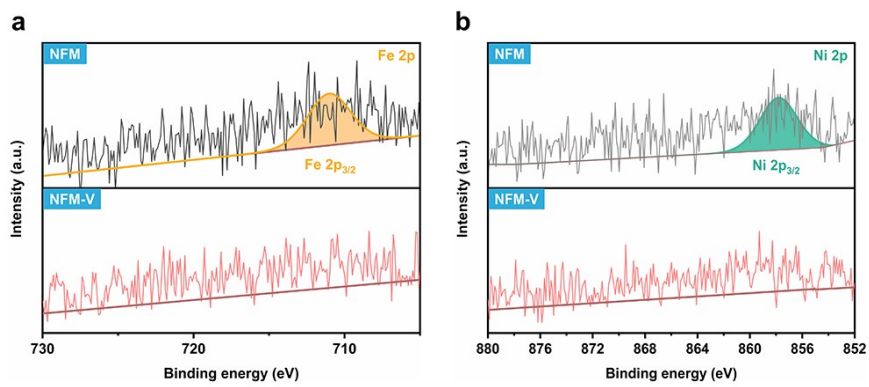

**Fig. S12.** XPS results of cycled cathodes for selected elements.

**Table S1.** ICP-OES results of all the samples.

| Theoretical chemical formula                                                      | Measured atomic ratio |       |       |       |        |
|-----------------------------------------------------------------------------------|-----------------------|-------|-------|-------|--------|
|                                                                                   | Na                    | Ni    | Mn    | Fe    | V      |
| $\text{NaNi}_{0.333}\text{Mn}_{0.333}\text{Fe}_{0.333}\text{O}_2$                 | 1.003                 | 0.337 | 0.335 | 0.333 | 0      |
| $\text{NaNi}_{0.331}\text{Mn}_{0.331}\text{Fe}_{0.331}\text{V}_{0.005}\text{O}_2$ | 1.001                 | 0.333 | 0.332 | 0.331 | 0.0048 |
| $\text{NaNi}_{0.330}\text{Mn}_{0.330}\text{Fe}_{0.330}\text{V}_{0.010}\text{O}_2$ | 1.006                 | 0.328 | 0.330 | 0.329 | 0.0106 |
| $\text{NaNi}_{0.328}\text{Mn}_{0.328}\text{Fe}_{0.328}\text{V}_{0.015}\text{O}_2$ | 0.997                 | 0.325 | 0.329 | 0.323 | 0.0140 |

**Table S2.** Crystallographic data and refinement parameters of all the samples.

| Samples               | NFM     | NFMV-0.5 | NFMV-1  | NFMV-1.5 |
|-----------------------|---------|----------|---------|----------|
| $a, b$ [Å]            | 2.9788  | 2.9775   | 2.9742  | 2.9722   |
| $c$ [Å]               | 16.0304 | 16.0375  | 16.0518 | 16.0578  |
| $\alpha, \beta$ [°]   | 90      | 90       | 90      | 90       |
| $\gamma$ [°]          | 120     | 120      | 120     | 120      |
| $V$ [Å <sup>3</sup> ] | 123.189 | 123.134  | 122.972 | 122.85   |
| $R_p$ [%]             | 1.75    | 4.35     | 1.31    | 1.51     |
| $R_{wp}$ [%]          | 2.47    | 5.58     | 1.86    | 2.05     |

**Table S3.** Atomic distances, slab thickness and d-spacing of the Na layer for NFM and NFMV-1 from XRD refinement.

| Samples              | NFM   | NFMV-1 |
|----------------------|-------|--------|
| TM-O [Å]             | 2.089 | 2.076  |
| Na-O [Å]             | 2.272 | 2.284  |
| TMO <sub>2</sub> [Å] | 2.372 | 2.336  |
| Na-spacing [Å]       | 2.970 | 3.014  |
| Interlayer [Å]       | 5.342 | 5.350  |



**Table S4.** The calculated diffusion coefficients by GITT test for (a) NFM, (b) NFMV-1.

| Samples | Charge                                                           | Discharge                                                        |
|---------|------------------------------------------------------------------|------------------------------------------------------------------|
|         | $D_{\text{Na}^+}$ [ $10^{-11}$ cm <sup>2</sup> s <sup>-1</sup> ] | $D_{\text{Na}^+}$ [ $10^{-11}$ cm <sup>2</sup> s <sup>-1</sup> ] |
| NFM     | 6.80                                                             | 3.95                                                             |
| NFMV-1  | 12.32                                                            | 5.94                                                             |

**Table S5.** EIS test results for (a) NFM, (b) NFMV after different cycled.

| Samples               | $R_s$ ( $\Omega$ ) | $R_{sf}$ ( $\Omega$ ) | $R_{ct}$ ( $\Omega$ ) |
|-----------------------|--------------------|-----------------------|-----------------------|
| NFM-uncycled          | 5.4                | 0                     | 257.0                 |
| NFMV-uncycled         | 5.4                | 0                     | 153.2                 |
| NFM-after 2 cycled    | 5.4                | 0                     | 274.1                 |
| NFMV-after 2 cycled   | 5.6                | 0                     | 164.8                 |
| NFM-after 500 cycled  | 7.2                | 469.7                 | 734.2                 |
| NFMV-after 500 cycled | 7.0                | 218.0                 | 587.4                 |

**Table S6.** Comparison of cycling performances of V-NFM with other modified NFM cathodes.

| Cathode               | Voltage window (V) | Cycling stability | Ref.      |
|-----------------------|--------------------|-------------------|-----------|
| NVO-NFM               | 2.0-4.0 V          | 75.8%, 500, 2 C   | This work |
|                       |                    | 96.4%, 150, 0.5 C |           |
| NFM                   | 2.0-4.0 V          | 50.7%, 500, 2 C   | This work |
|                       |                    | 74.2%, 150, 0.5 C |           |
| Zn-NFM                | 2.0-4.0 V          | 86.53%, 200, 1C   | 1         |
| F-NFM                 | 2.0-4.0 V          | 90%, 70, 1C       | 2         |
| ZrO <sub>2</sub> -NFM | 1.5-4.0 V          | 86%, 100, 1 C     | 3         |
| MoF-NFM               | 2.0-4.0 V          | 91.97%, 100, 1C   | 4         |
| NTP-NFM               | 1.5-4.2 V          | 77.5%, 100, 1C    | 5         |
| Sn-NFM                | 2.0-4.1 V          | 75%, 150, 0.5C    | 6         |

**Table S7.** Crystallographic and Rietveld refinement data of the NFM cathode.

| Atom | Wyckoff position | x | y | z           | Occ.  |
|------|------------------|---|---|-------------|-------|
| Na   | 3b               | 0 | 0 | 0           | 1     |
| Ni   | 3a               | 0 | 0 | 0.5         | 0.333 |
| Mn   | 3a               | 0 | 0 | 0           | 0.333 |
| Fe   | 3a               | 0 | 0 | 0           | 0.333 |
| O    | 6c               | 0 | 0 | 0.25933(14) | 1     |

**Table S8.** Crystallographic and Rietveld refinement data of the NFMV-1 cathode.

| Atom | Wyckoff position | x | y | z           | Occ.  |
|------|------------------|---|---|-------------|-------|
| Na   | 3b               | 0 | 0 | 0           | 1     |
| Ni   | 3a               | 0 | 0 | 0.5         | 0.330 |
| Mn   | 3a               | 0 | 0 | 0           | 0.330 |
| Fe   | 3a               | 0 | 0 | 0           | 0.330 |
| V    | 3a               | 0 | 0 | 0           | 0.010 |
| O    | 6c               | 0 | 0 | 0.26055(10) | 1     |

**Table S9.** EXAFS fitting results for Fourier transformed  $k^3 \times (k)$  Ni K-edges structural parameters of samples.

| Samples | Atom  | X-Y pair | CN | R (Å)   | $\sigma^2 / (10^{-2} \text{Å}^2)$ | $\Delta E_0$ (eV) | R-factor |
|---------|-------|----------|----|---------|-----------------------------------|-------------------|----------|
| NFM     | Ni-O  | Ni-O     | 6  | 2.06929 | 0.779                             | -5.558            | 0.006    |
|         | Ni-TM | Ni-TM    | 6  | 2.95681 | 0.720                             |                   |          |
| NFMV-1  | Ni-O  | Ni-O     | 6  | 2.09134 | 0.983                             | -2.752            | 0.014    |
|         | Ni-TM | Ni-TM    | 6  | 2.99016 | 0.719                             |                   |          |

CN: coordination number; R: bond length;  $\sigma^2$  : Debye-Waller factor (disorder);  $\Delta E_0$ : energy parameter.

**Table S10** Transition metal ion dissolution results of cycled batteries.

| Sample | Concentration (ug/L) |        |       |
|--------|----------------------|--------|-------|
|        | Ni                   | Fe     | Mn    |
| NFM    | 276.34               | 650.53 | 16.93 |
| NFMV-1 | 154.35               | 443.78 | 15.89 |

## Reference

1. W. Qin, Y. Liu, J. Liu, Z. Yang and Q. Liu, *Electrochimica Acta*, 2022, **418**.
2. Q. Zhang, Y. Huang, Y. Liu, S. Sun, K. Wang, Y. Li, X. Li, J. Han and Y. Huang, *Science China Materials*, 2017, **60**, 629-636.
3. Y. Yu, D. Ning, Q. Li, A. Franz, L. Zheng, N. Zhang, G. Ren, G. Schumacher and X. Liu, *Energy Storage Materials*, 2021, **38**, 130-140.
4. W. Li, Q. Chen, D. Zhang, C. Fang, S. Nian, W. Wang, C. Xu and C. Chang, *Materials Today Communications*, 2022, **32**.
5. S. Zhao, Q. Shi, R. Qi, X. Zou, J. Wang, W. Feng, Y. Liu, X. Lu, J. Zhang, X. Yang and Y. Zhao, *Electrochimica Acta*, 2023, **441**.
6. T. Song, L. Chen, D. Gastol, B. Dong, J. F. Marco, F. Berry, P. Slater, D. Reed and E. Kendrick, *Chem Mater*, 2022, **34**, 4153-4165.
